# Supplementary material for: Efficacy and Safety of Coronary Intervention via Distal Transradial Access (dTRA) in Patients with Low Body Mass Index
Source: J Interv Cardiol. 2022 Aug 24;2022:1901139. doi: 10.1155/2022/1901139 (PMC9433246; doi:10.1155/2022/1901139)
Supplement: Supplementary Materials — Supplementary Figure 1: The number of STEMI, NSTEMI, UA, SAP, and non-CAD patients between the two groups. Supplementary Table 1: Comparison of the safety in patients of STEMI between the two subgroups. Supplementary Table 2: Comparison of the safety in patients of NSTEMI between the two subgroups. [file 1901139.f1.zip]

Archive with 3 entries (3 files):
- Supplementary Figures.doc
- Supplementary Table 1.doc
- Supplementary Table 2.docx
